# Supplementary material for: Structure and nitrite reduction reactivity study of bio-inspired copper(i)–nitro complexes in steric and electronic considerations of tridentate nitrogen ligands
Source: Royal Society of Chemistry journal article supplement (doi:10.1039/c7dt03843g), 2018-01-01
Supplement: c7dt03843g1.pdf [file c7dt03843g1.pdf]

Electronic Supplementary Information (ESI)

**Structure and Nitrite Reduction Reactivity Study of Bio-inspired  
Copper(I)-nitro Complexes in Steric and Electronic Considerations of  
Tridentate Nitrogen Ligand**

Yu-Lun Chang<sup>a,b</sup>, Ya-Fan Lin<sup>a,c</sup>, Wan-Jung Chuang<sup>a</sup>, Chai-Lin Kao<sup>a,b</sup>, Manmath Narwane<sup>a</sup>,  
Hsing-Yin Chen<sup>a</sup>, Michael Y. Chiang<sup>a,b</sup>, Sodio C. N. Hsu<sup>\*,a,d</sup>

<sup>a</sup>*Department of Medicinal and Applied Chemistry, Kaohsiung Medical University, Kaohsiung  
807, Taiwan*

<sup>b</sup>*Department of Chemistry, National Sun Yat-Sen University, Kaohsiung 804, Taiwan*

<sup>c</sup>*Department of Fragrance and Cosmetic Science, Kaohsiung Medical University, Kaohsiung  
807, Taiwan*

<sup>d</sup>*Department of Medical Research, Kaohsiung Medical University Hospital, Kaohsiung 807,  
Taiwan*

**Table S1.** Crystallographic details

|                                                            | <b>1</b>                                                        | <b>2</b>                                                                        |
|------------------------------------------------------------|-----------------------------------------------------------------|---------------------------------------------------------------------------------|
| empirical formula                                          | C <sub>22</sub> H <sub>34</sub> CuN <sub>7</sub> O <sub>2</sub> | C <sub>57</sub> H <sub>64</sub> BCuN <sub>8</sub> O <sub>2</sub> P <sub>2</sub> |
| formula weight                                             | 492.10                                                          | 1029.45                                                                         |
| <i>T</i> (K)                                               | 200(2)                                                          | 200(2)                                                                          |
| crystal size (mm)                                          | 0.26 x 0.14 x 0.12                                              | 0.40 x 0.35 x 0.25                                                              |
| crystal system                                             | Trigonal                                                        | Triclinic                                                                       |
| space group                                                | R 3 m                                                           | P-1                                                                             |
| <i>a</i> (Å)                                               | 16.177(5)                                                       | 13.1118(3)                                                                      |
| <i>b</i> (Å)                                               | 16.177(5)                                                       | 13.2532(4)                                                                      |
| <i>c</i> (Å)                                               | 8.509(3)                                                        | 18.1725(6)                                                                      |
| $\alpha$ (deg)                                             | 90                                                              | 96.0070(10)                                                                     |
| $\beta$ (deg)                                              | 90                                                              | 98.3170(10)                                                                     |
| $\gamma$ (deg)                                             | 120                                                             | 107.554(2)                                                                      |
| <i>V</i> (Å <sup>3</sup> )                                 | 1928.5(14)                                                      | 2942.15(15)                                                                     |
| <i>Z</i>                                                   | 3                                                               | 2                                                                               |
| <i>D</i> <sub>calcd</sub> (g cm <sup>-3</sup> )            | 1.271                                                           | 1.162                                                                           |
| $\mu$ (mm <sup>-1</sup> )                                  | 0.880                                                           | 0.471                                                                           |
| max./min. transm                                           | 0.900 / 0.863                                                   | 0.8874 / 0.82                                                                   |
| reflns mcasd/indep                                         | 2696 / 833                                                      | 20994 / 10105                                                                   |
| data/restraints/params                                     | 833 / 1 / 68                                                    | 10150 / 0 / 628                                                                 |
| GOF                                                        | 1.065                                                           | 1.181                                                                           |
| <i>R</i> <sub>int</sub>                                    | 0.0264                                                          | 0.0587                                                                          |
| <i>R</i> <sub>1</sub> [ <i>I</i> > 2 $\sigma$ ] (all data) | 0.274 (0.0301)                                                  | 0.0638 (0.1019)                                                                 |
| <i>R</i> <sub>w</sub> [ <i>I</i> > 2 $\sigma$ ] (all data) | 0.0274 (0.0669)                                                 | 0.1537 (0.1674)                                                                 |
| max. peak/hole (e <sup>-</sup> / Å <sup>3</sup> )          | 0.212 / -0.202                                                  | 1.131 / -0.907                                                                  |

**Complex 1 :**

PLAT232\_ALERT\_2\_B Hirshfeld Test Diff (M-X) Cu --N1 . 10.2 s.u.

--- There is no doubt on atom assignments and the high Hirshfeld test difference may resulted from possible minor disordered mode.

PLAT987\_ALERT\_1\_B The Flack x is >> 0 - Do a BASF/TWIN Refinement Please Check

---After trying with TWIN/BASF refinement, the Flack parameter remains as 0.04(1). The acceptable number is 0.03(1). It is not significantly different.

**Complex 2:**

PLAT230\_ALERT\_2\_B Hirshfeld Test Diff for O1 -- N1 .. 8.5 s.u.

PLAT230\_ALERT\_2\_B Hirshfeld Test Diff for C2 -- C5 .. 10.8 s.u.

---The O1 N2 C2 C5 are all terminal atoms with large ADP's. The atom assignments are confirmed and the high Hirshfeld test difference may resulted from possible minor disordered mode.

PLAT601\_ALERT\_2\_B Structure Contains Solvent Accessible VOIDS of . 152 Ang3

---The void is rather small. It may due to the unmatched shape of the cation and anion.

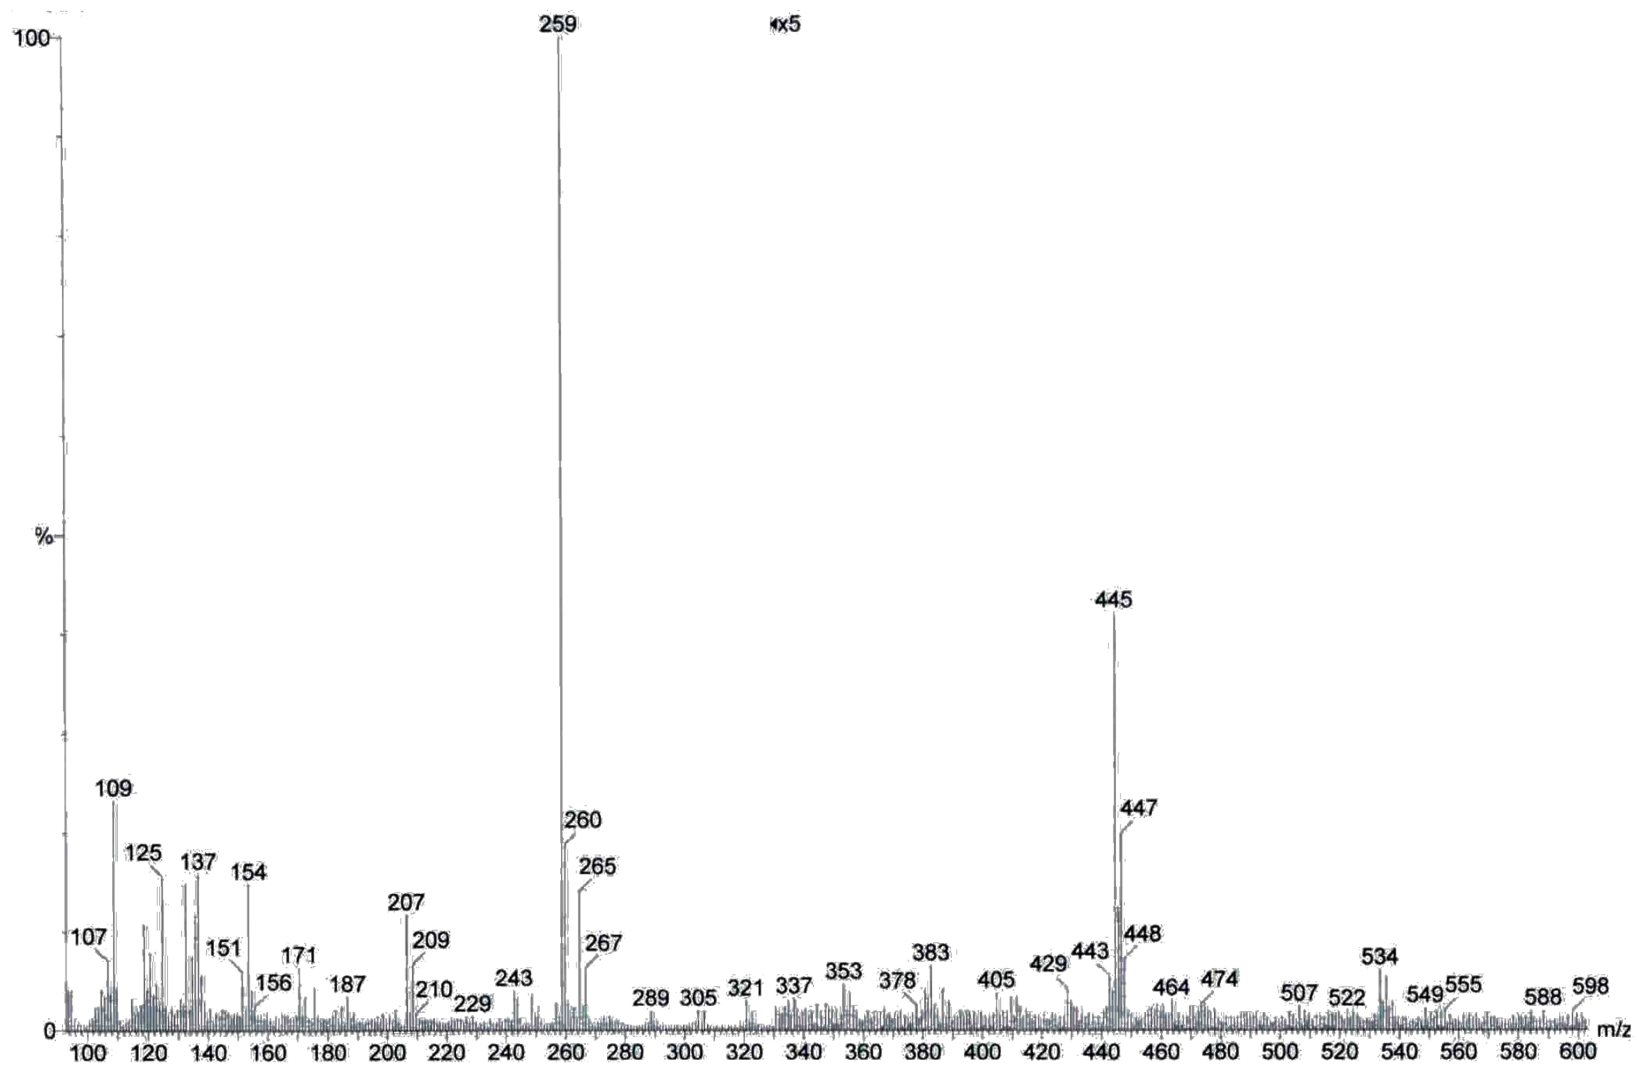

Figure S1. FAB-MS spectrum of 1.

ESI-MS-NEG-20160829-TERTCUNO2-1 29 (1.454) Cm (2:58)

Scan ES-  
1.53e4

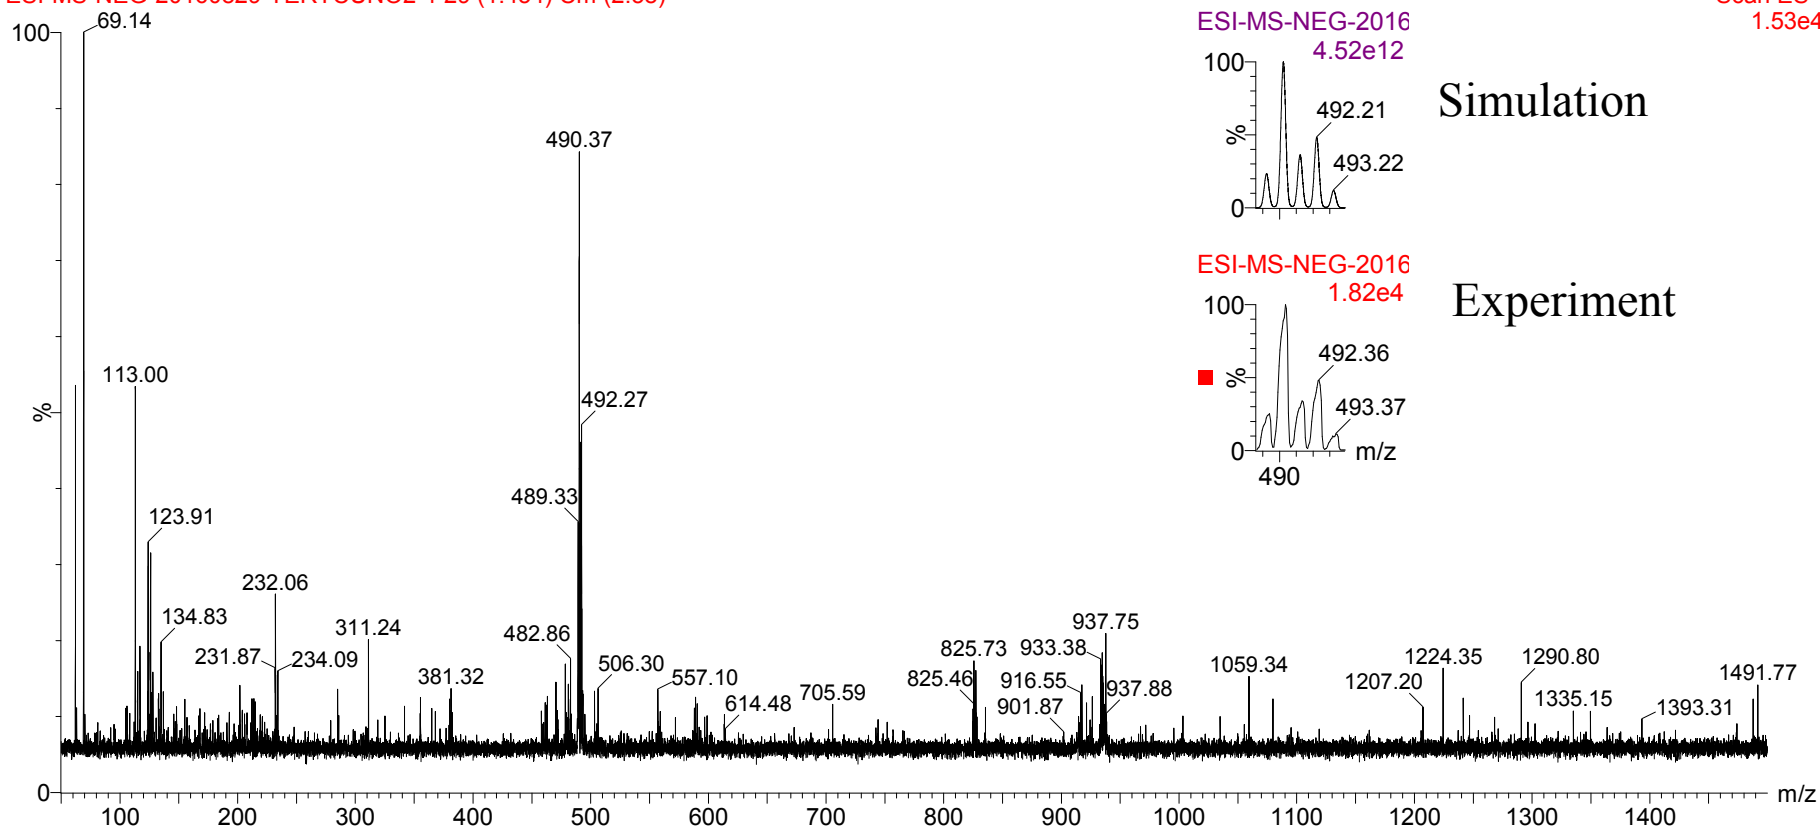

Figure S2. ESI-MS spectrum of 2.

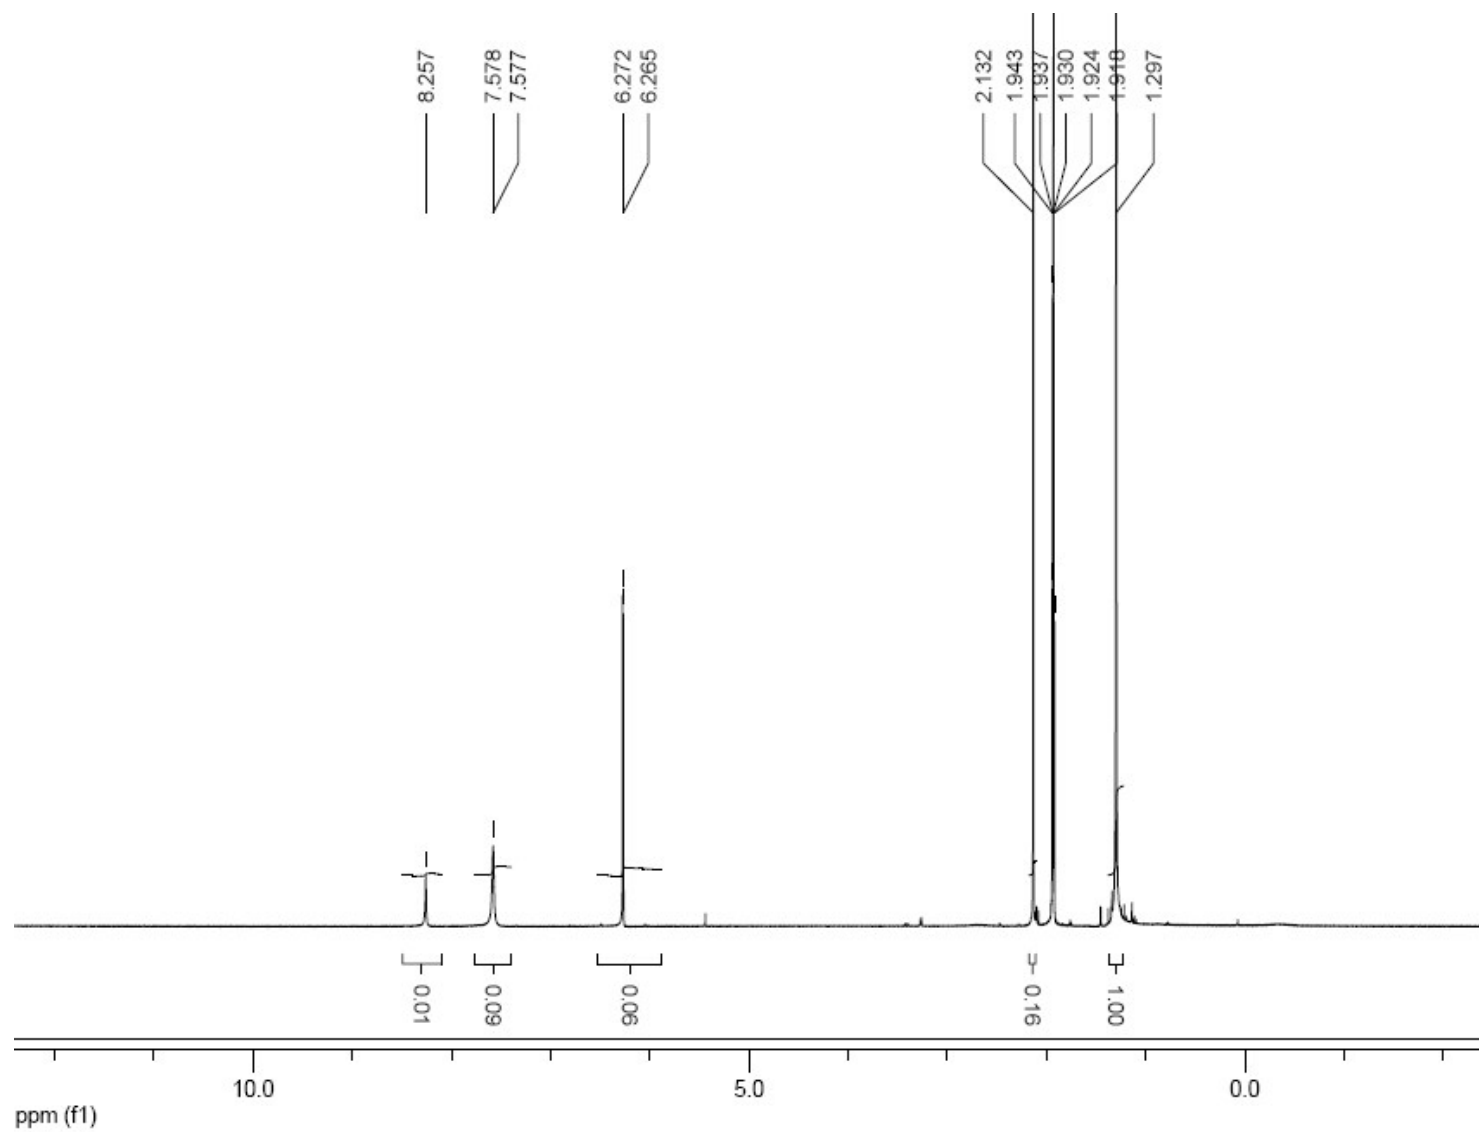

**Figure S3.**  $^1\text{H}$  NMR spectrum of **1** in acetonitrile- $d^3$ .

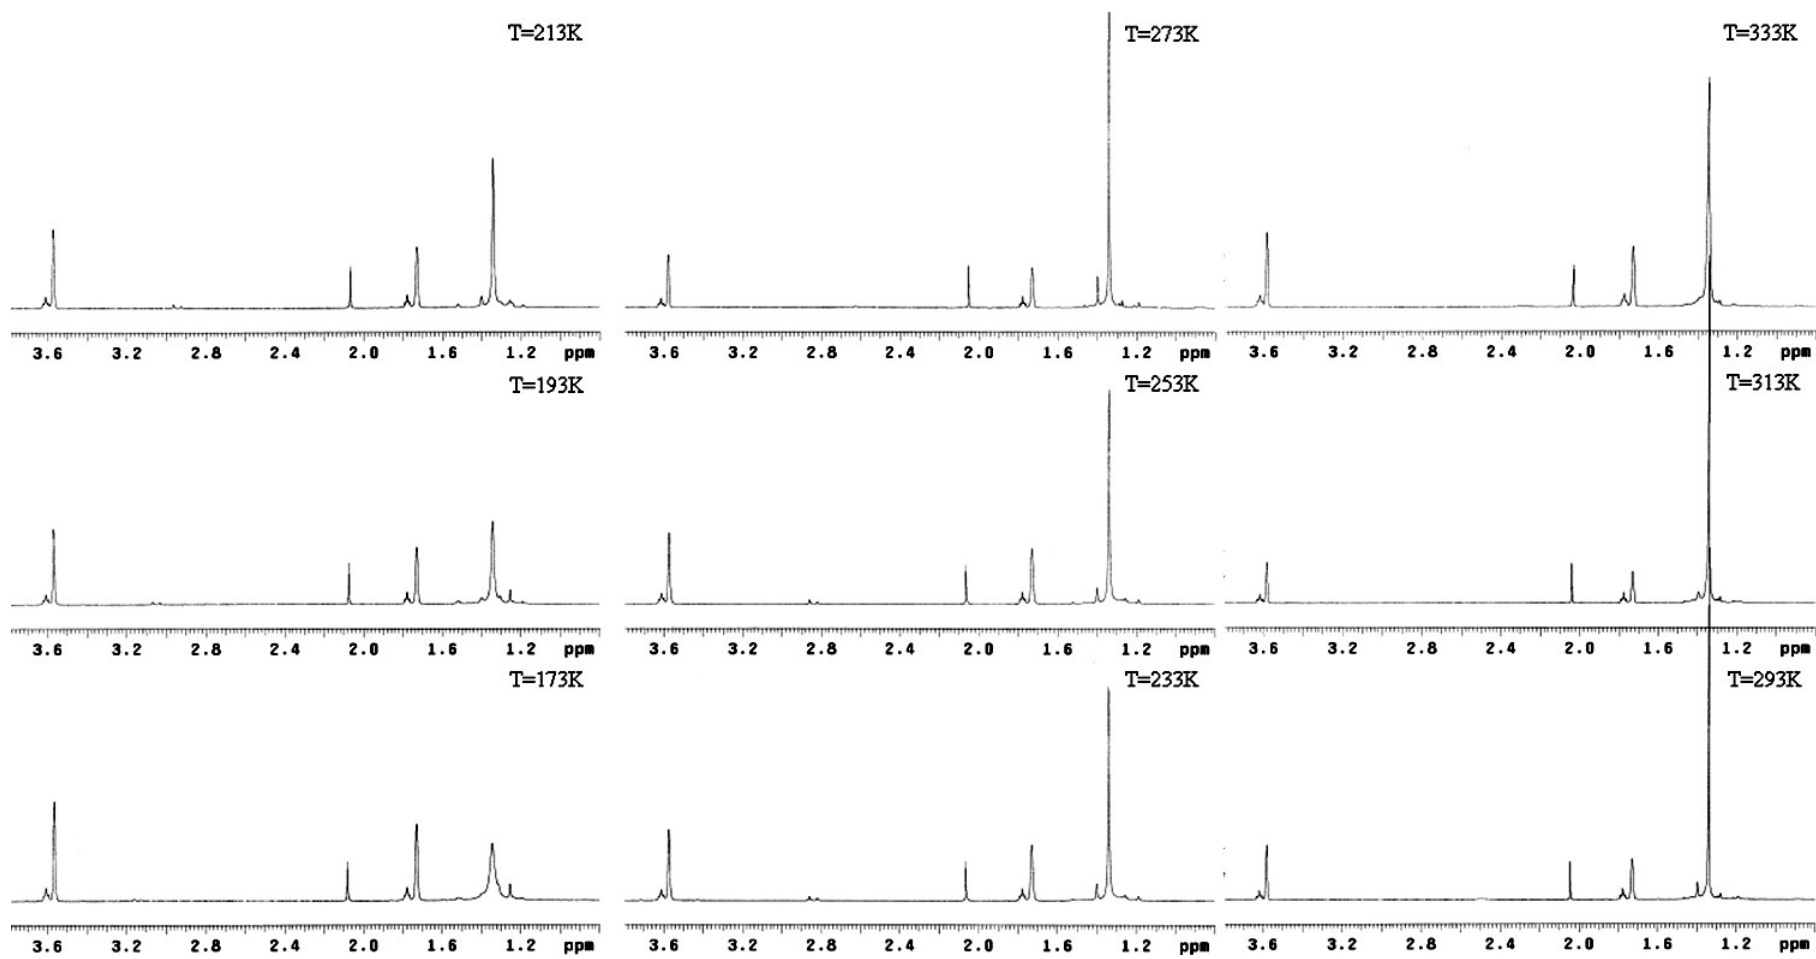

Figure S4.  $^1\text{H}$  NMR spectrum (1.0~3.8ppm) of **2** in  $\text{THF-}d^8$ .

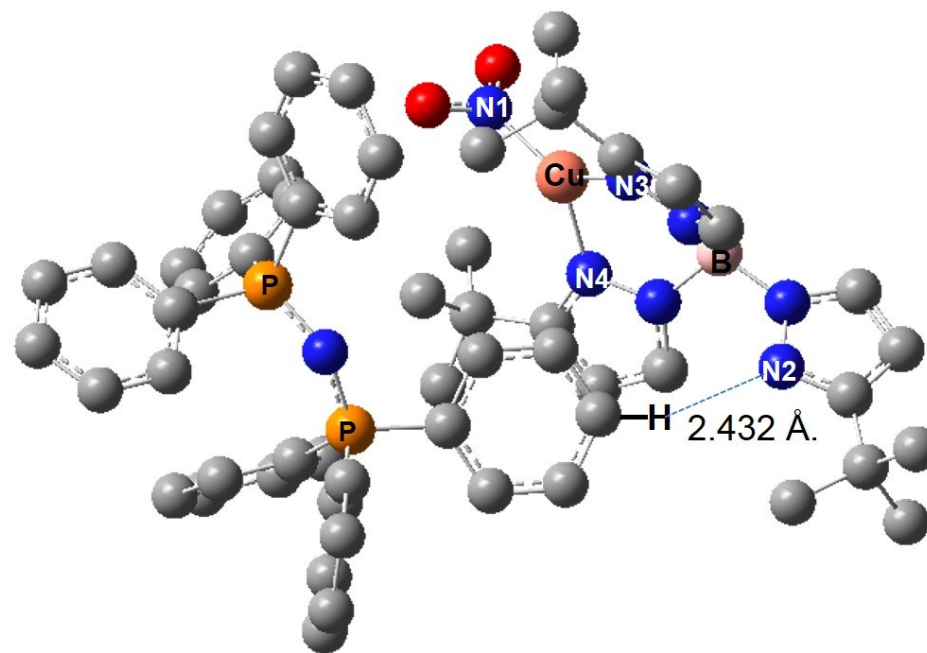

**Figure S5.** (a) Optimized structure of **2** (in gas phase). The shortest distance between  $[\text{Tp}^{\text{Me}_2}\text{Cu}(\text{NO}_2)]^-$  and  $[(\text{Ph}_3\text{P})_2\text{N}]^+$  was found to be 2.432 Å

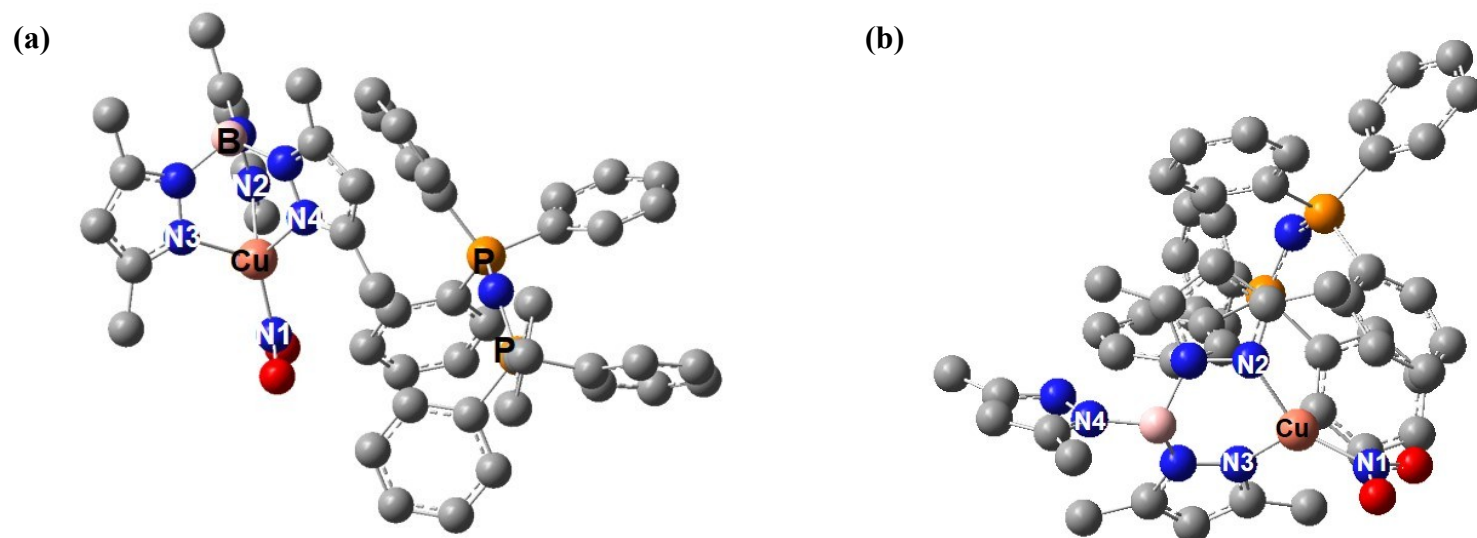

**Figure S6.** (a) Optimized structures of  $[(\text{Ph}_3\text{P})_2\text{N}][\text{Tp}^{\text{Me}_2}\text{Cu}(\text{NO}_2)]$  (in gas phase): (a) a tetra-coordinated geometry, relative  $E = 0$  kcal/mol; (b) a tri-coordinated geometry, relative  $E = 18.7$  kcal/mol.



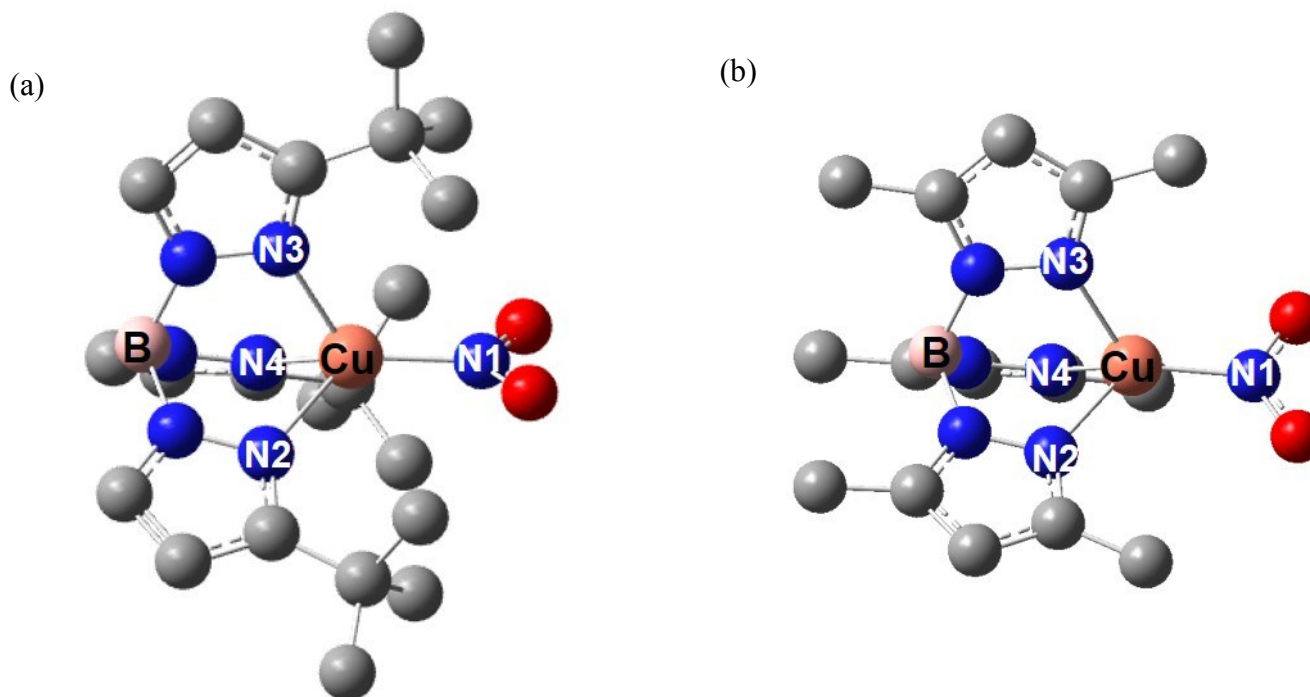

**Figure S7.** (a) Optimized structure of  $[\text{Tp}^{3-t\text{Bu}}\text{Cu}(\text{NO}_2)]^-$  (in gas phase). Selected bond lengths ( $\text{\AA}$ ) and bond angles ( $^\circ$ ): Cu–N1 1.902, Cu–N2 2.156, Cu–N3 2.123, Cu–N4 2.045, N2–Cu–N3 88.03, N3–Cu–N4 92.55, N2–Cu–N4 91.98 (2) Optimized structure of  $[\text{Tp}^{\text{Me}2}\text{Cu}(\text{NO}_2)]^-$  (in gas phase). Selected bond lengths ( $\text{\AA}$ ) and bond angles ( $^\circ$ ): Cu–N1 1.886, Cu–N2 2.103, Cu–N3 2.023, Cu–N4 2.017, N2–Cu–N3 90.45, N3–Cu–N4 92.41, N2–Cu–N4 90.79.

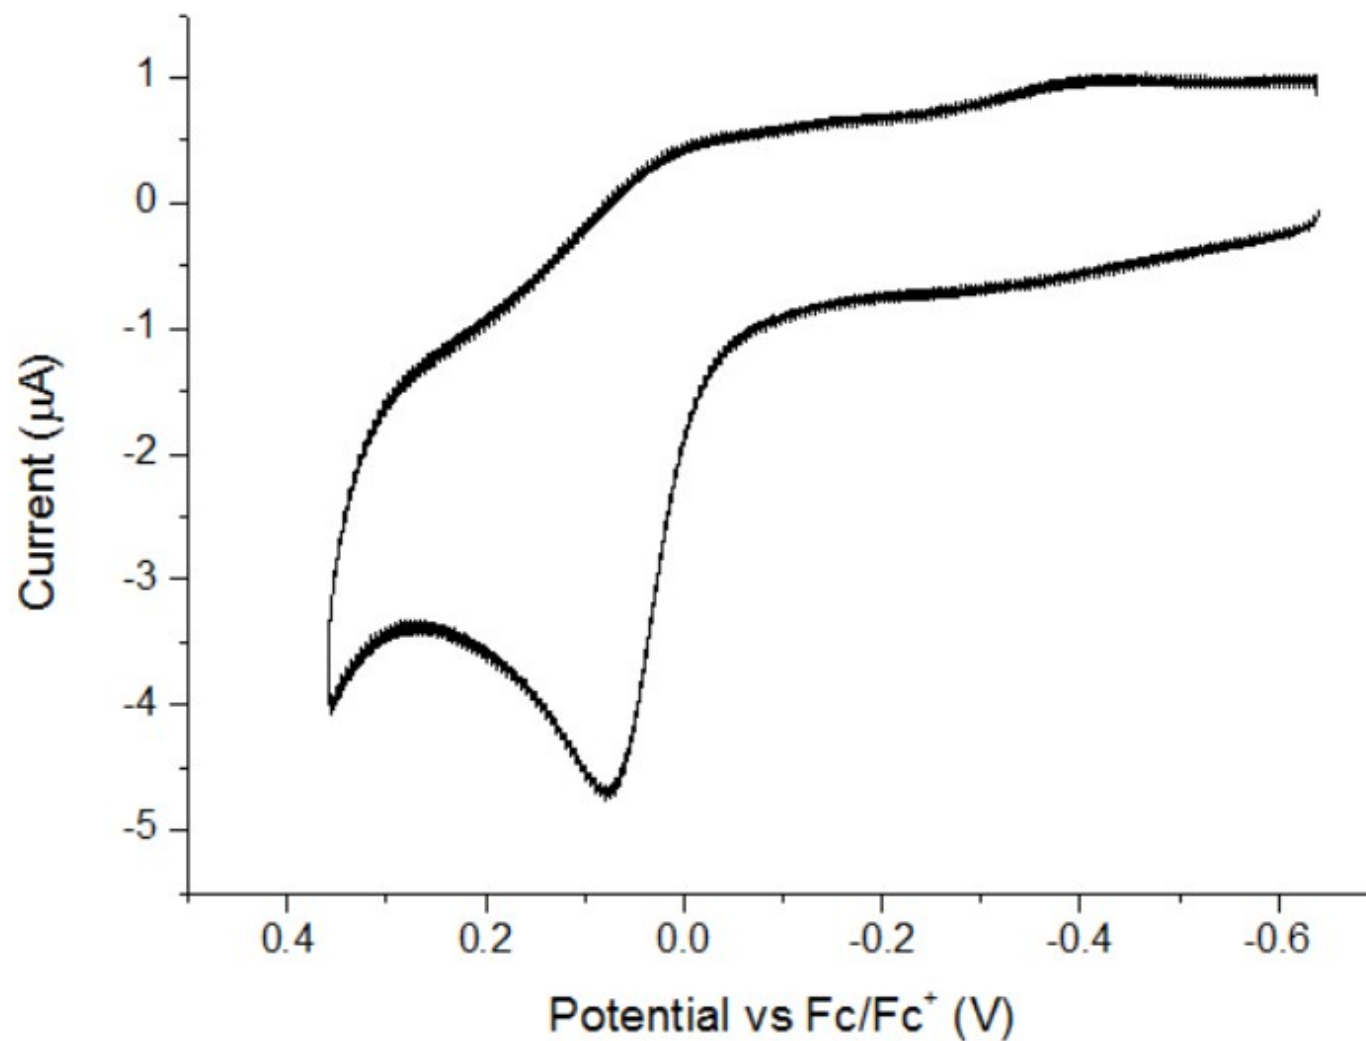

**Figure S8.** Cyclic voltammetry of **2** where the measured  $E_{pa}$  is 0.08 V vs. Fc. Cyclic voltammetry measurements were taken in  $10^{-4}$  M MeCN solutions using 0.1 M  $(\text{Bu}_4\text{N})(\text{PF}_6)$  as supporting electrolyte and referenced to  $\text{Fc}^{+/0}$ .

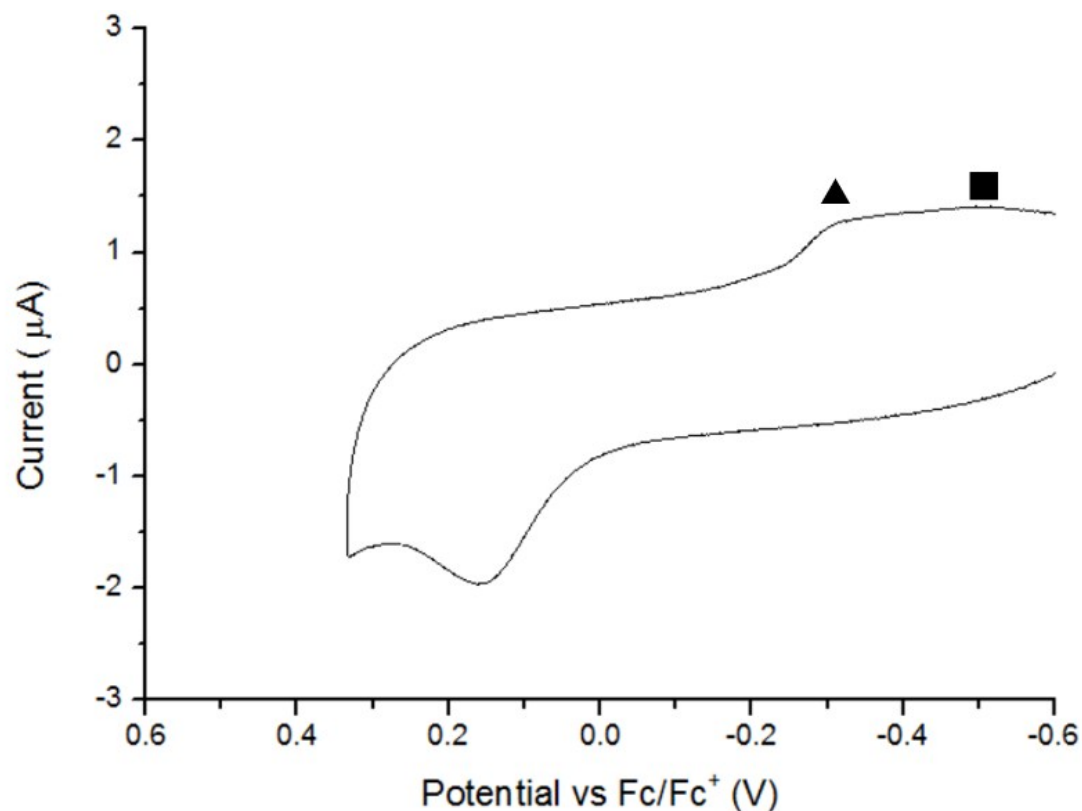

**Figure S9.** Cyclic voltammetry of **1** where the measured  $E_{pa}$  is 0.16 V vs. Fc. Cyclic voltammetry measurements were taken in  $10^{-4}$  M MeCN solutions using 0.1 M  $(\text{Bu}_4\text{N})(\text{PF}_6)$  as supporting electrolyte and referenced to  $\text{Fc}^{+/0}$ . The waves at  $E_{pc} = -0.32$  V ( $\blacktriangle$ ) and  $-0.50$  V ( $\blacksquare$ ) may be tentatively assigned to  $[\text{Tpm}^{3-t\text{Bu}}\text{Cu}(\text{NO}_2)]^{+/0}$  and  $[\text{Tpm}^{3-t\text{Bu}}\text{Cu}(\text{ONO})]^{+/0}$ , respectively. The assignments of redox potentials for  $\text{Tpm}^{3-t\text{Bu}}\text{Cu}^{\text{I/II}}$  couples nitro and nitrito isomers are according to literature precedent complex  $\text{TPACu}^{\text{II}}(\text{NO}_2)$  (TPA = Tris(2-pyridylmethyl)amine).<sup>1</sup>

1. K. Nobutoshi, N. Hirotsuka, K. Yoshinori, A. Gin-ya, S. Masatatsu, U. Akira and T. Koji, *Bull. Chem. Soc. Jpn.*, 1995, **68**, 581-589.

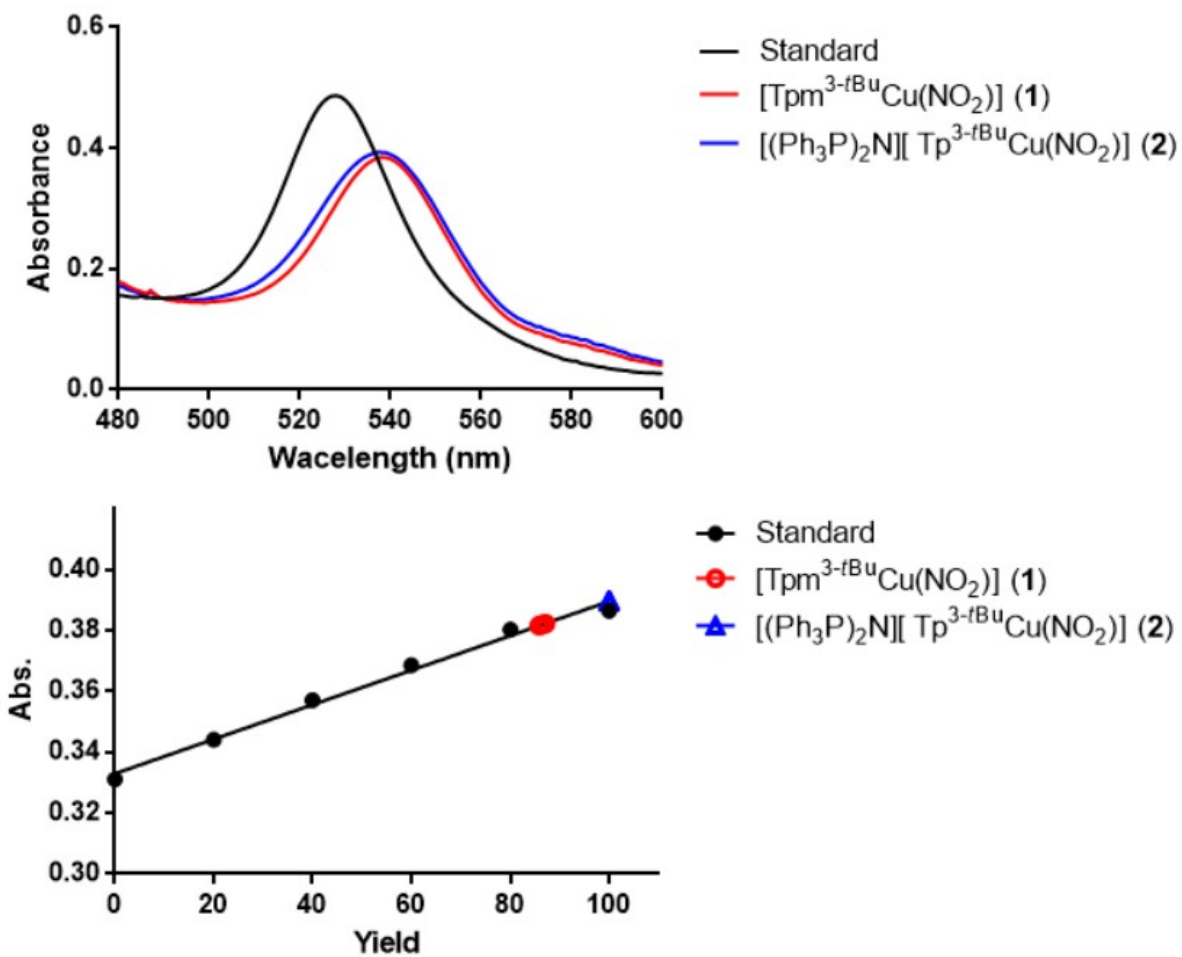

**Figure S10.** NO generation experiments for **1** and **2**. NO concentration was performed by calibrating curve response with known concentrations of NO mixed with N<sub>2</sub> (120ppm, 100ppm, 80ppm, 60ppm and 40ppm of NO in N<sub>2</sub>); molar quantities were calculated using the ideal gas equation.

ESI-MS-POS-20171220-TPM2-50-1500 1 (0.037) Cm (1:54)

Scan ES+  
5.15e7

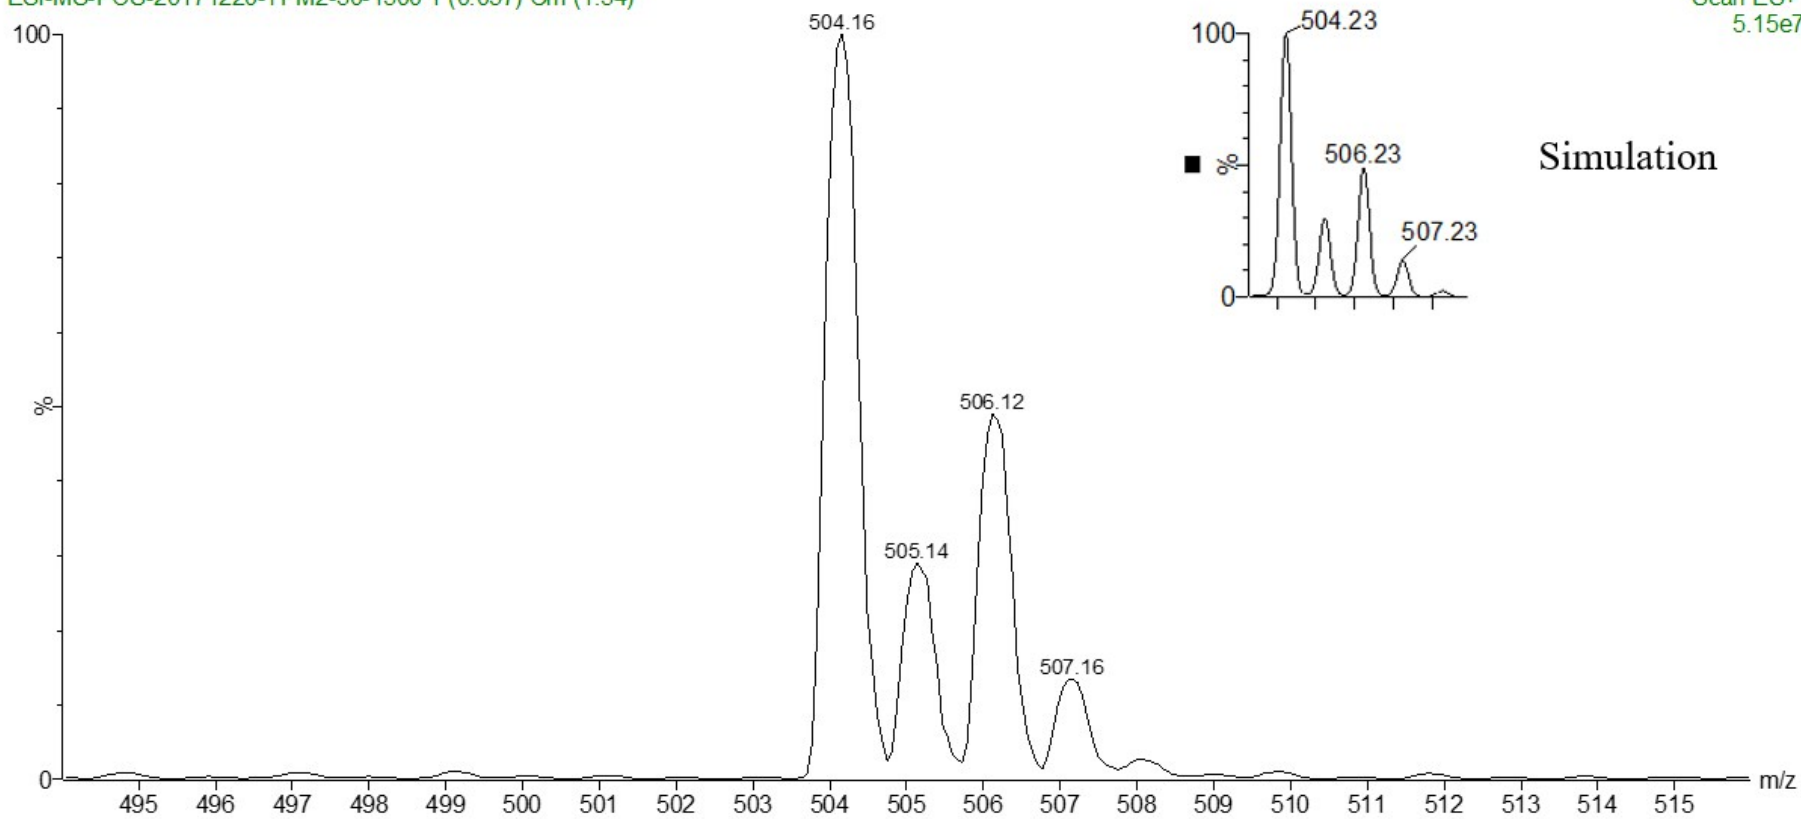

**Figure S11.** ESI-Mass spectrum of **3** :  $m/z = 504.16$   $[\text{Tpm}^{3t\text{Bu}}\text{Cu}(\text{OAc})]^+$ .

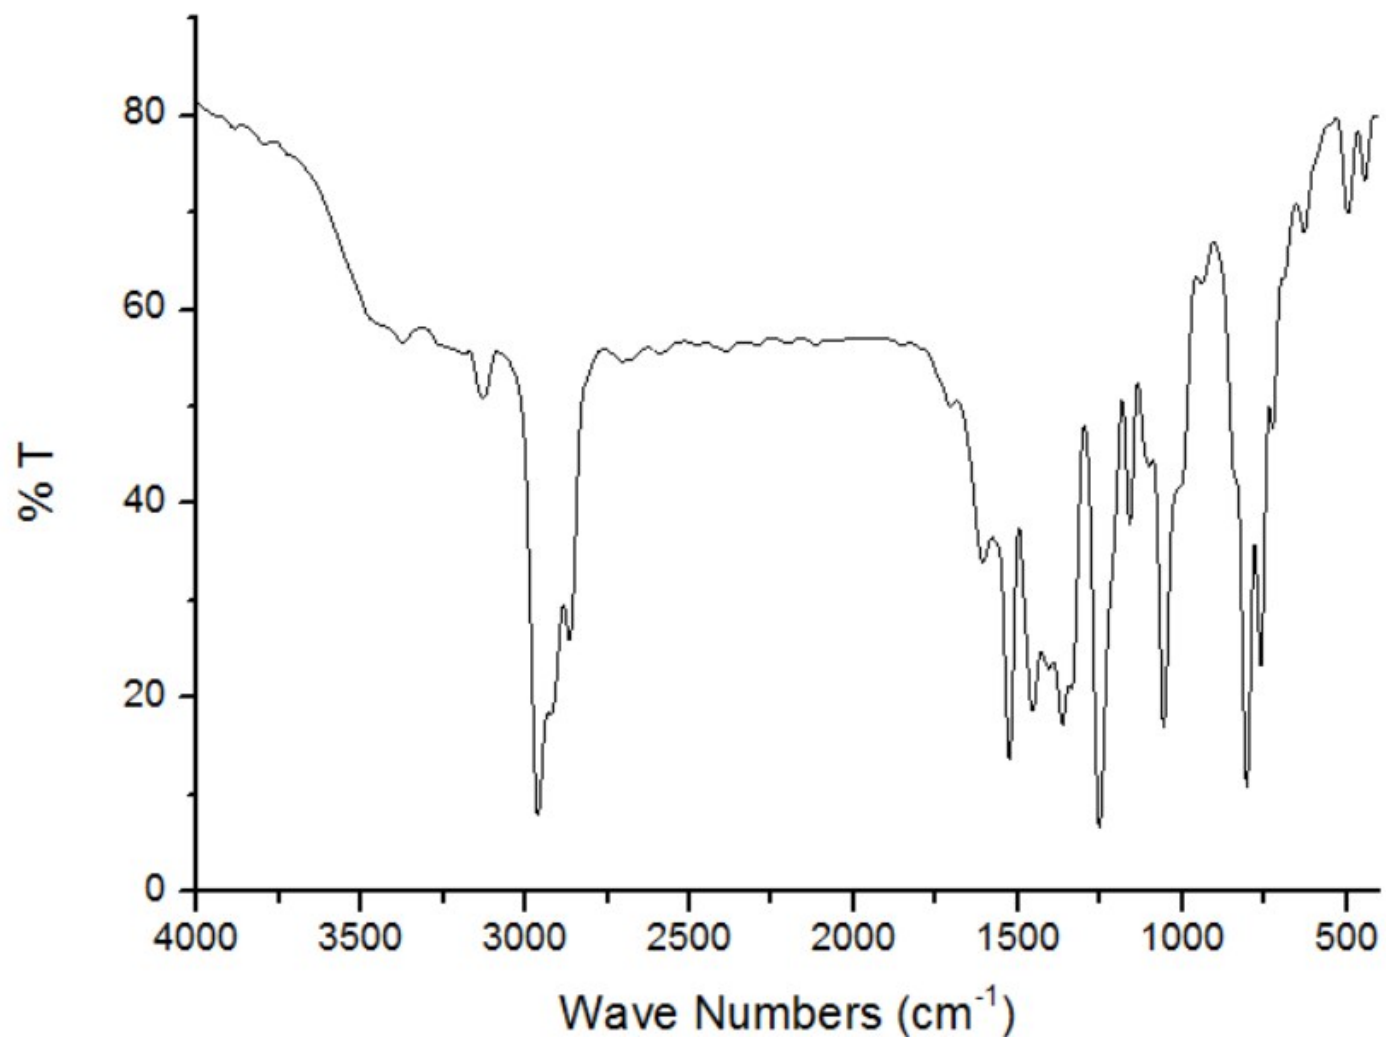

**Figure S12.** FTIR spectrum of **3** in KBr disk (400 cm<sup>-1</sup> - 4000 cm<sup>-1</sup>).

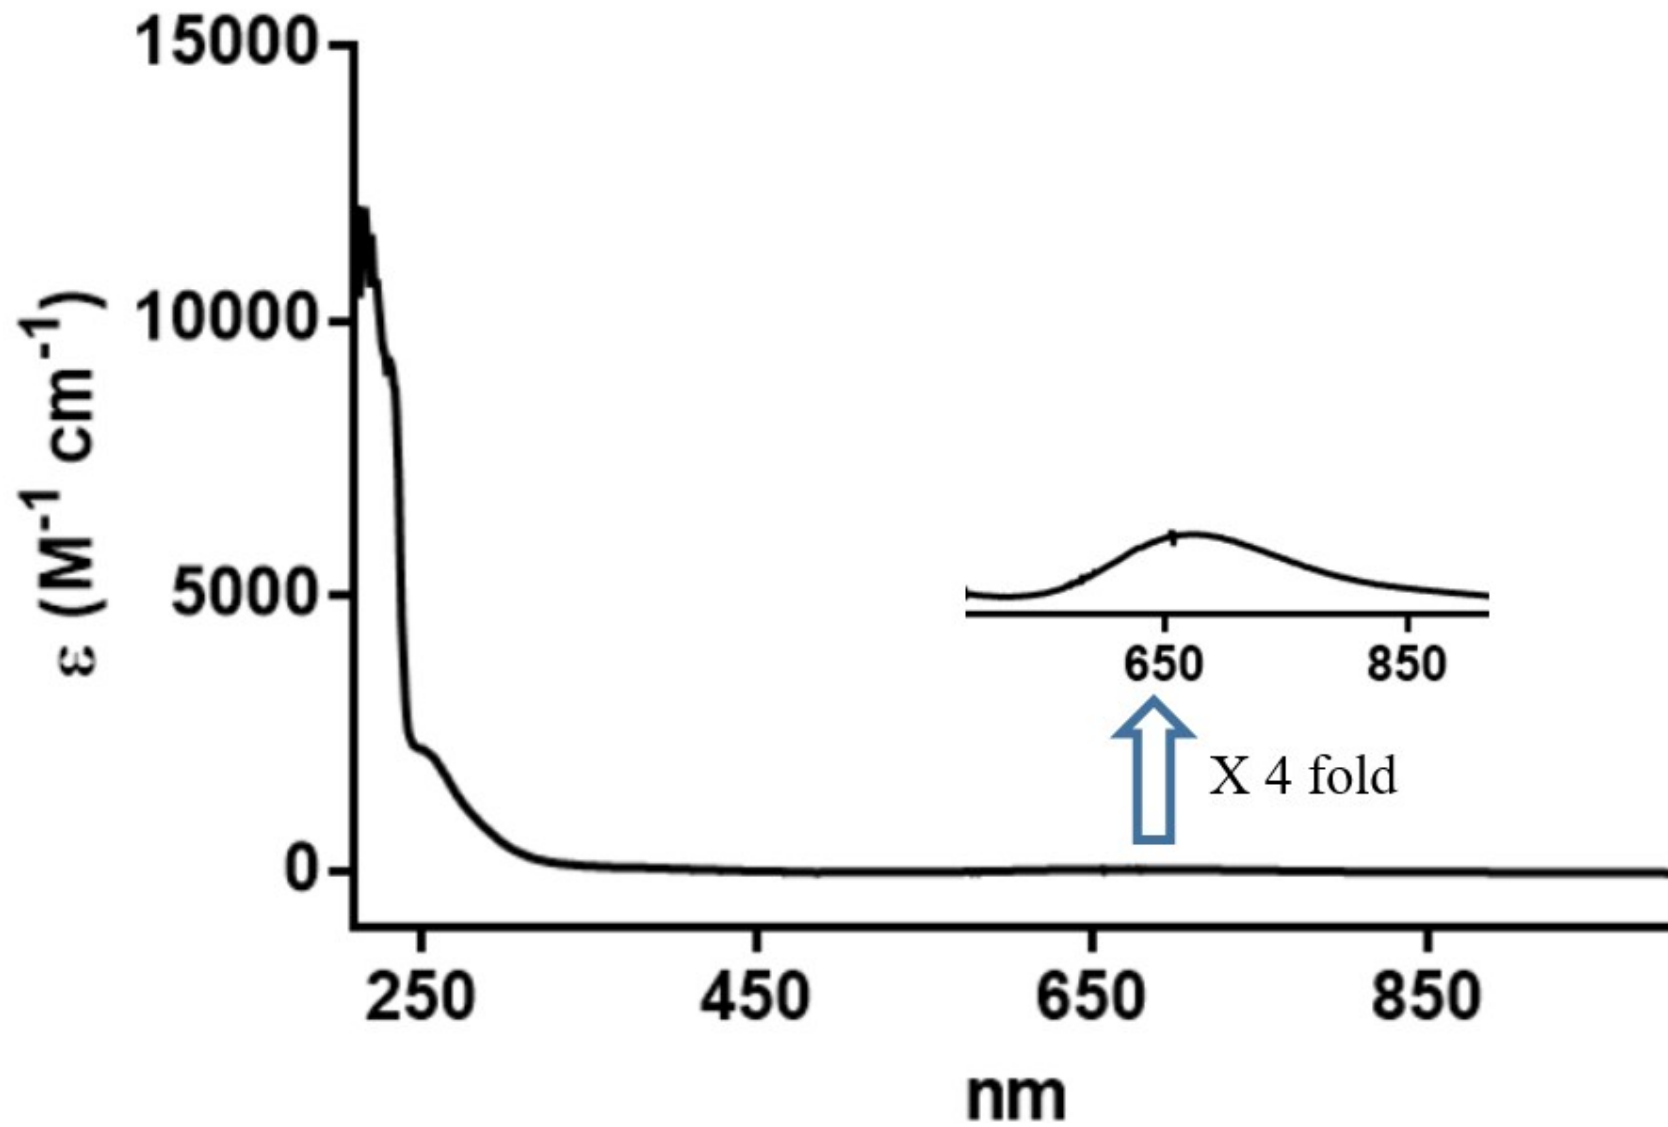

Figure S13. Absorption spectra of 3 in CH<sub>3</sub>CN at room temperature.

ESI-MS-POS-20160829-TERTCUNO2-1 14 (0.702) Cm (1:39)

Scan ES+  
1.61e7

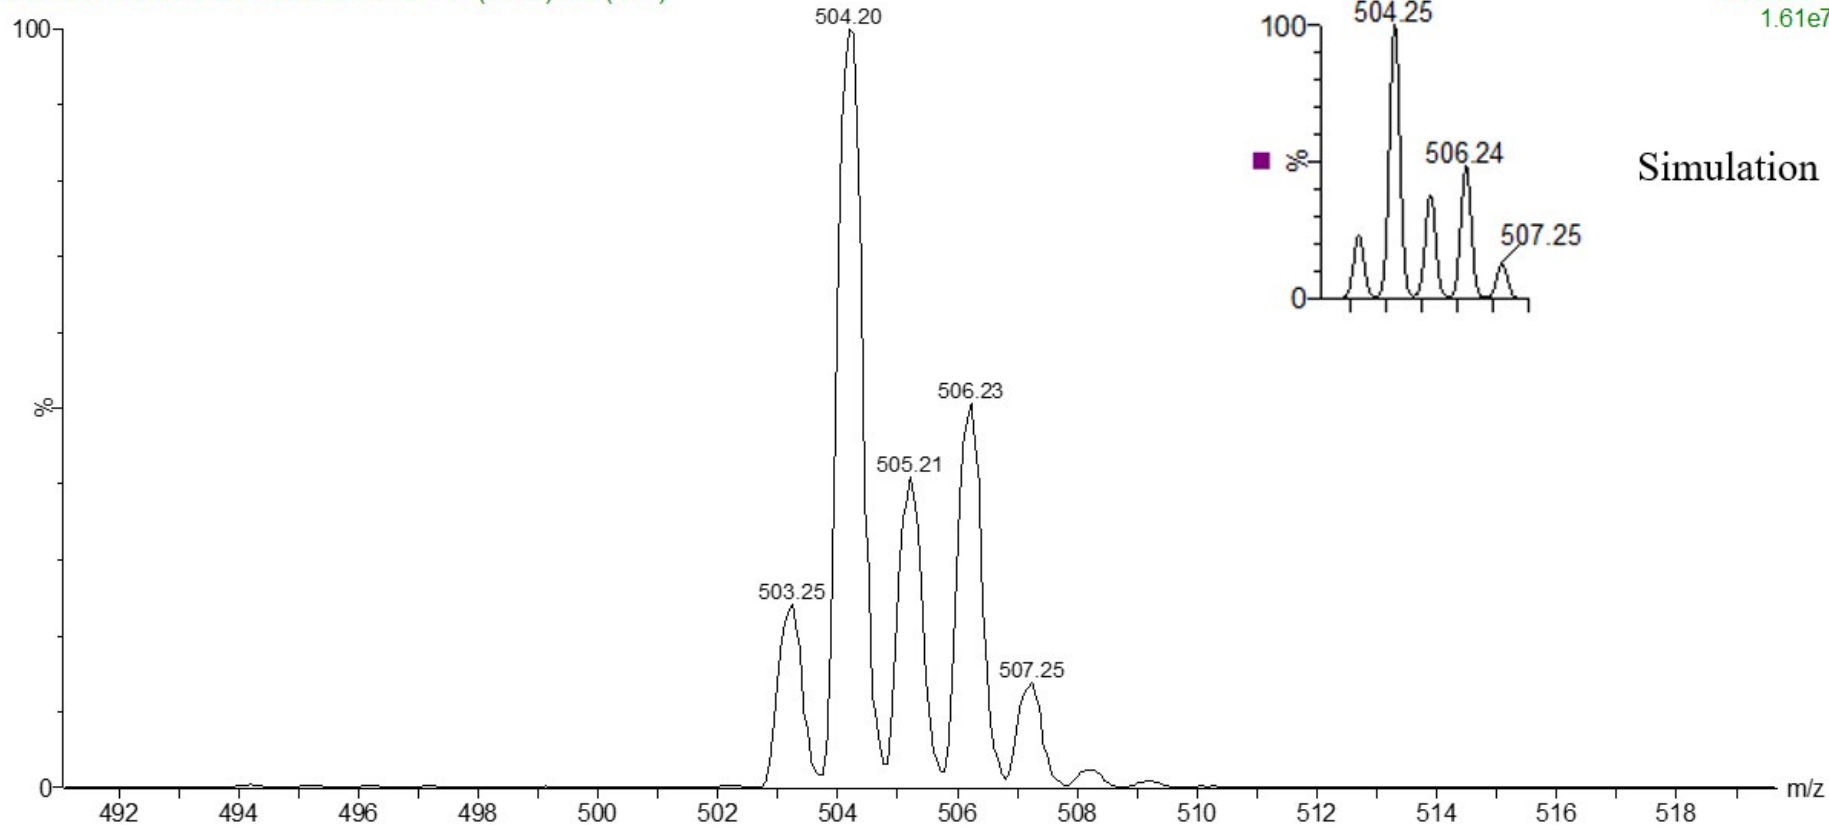

**Figure S14.** ESI-Mass spectrum of **4** in MeOH :  $m/z = 504.20$  [ $\text{Tp}^{3t\text{Bu}}\text{Cu}(\text{OAc}) + \text{H}^+$ ] $^+$ .
